# Supplementary material for: A Retrospective Longitudinal Within-Subject Risk Interval Analysis of Immunoglobulin Treatment for Recurrent Acute Exacerbation of Chronic Obstructive Pulmonary Disease
Source: PubMed Central journal article supplement (PMC4641695; doi:10.1371/journal.pone.0142205), 2015-11-11
Supplement: pone.0142205.s004.pdf [file pone.0142205.s004.pdf]

Appendix 4. STROBE Statement—checklist of items that should be included in reports of observational studies

|                           | <b>Item No.</b> | <b>Recommendation</b>                                                                                                                                                                | <b>Page No.</b> | <b>Relevant text from manuscript</b>               |
|---------------------------|-----------------|--------------------------------------------------------------------------------------------------------------------------------------------------------------------------------------|-----------------|----------------------------------------------------|
| <b>Title and abstract</b> | 1               | (a) Indicate the study's design with a commonly used term in the title or the abstract                                                                                               | 1               | Retrospective longitudinal within-subject analysis |
|                           |                 | (b) Provide in the abstract an informative and balanced summary of what was done and what was found                                                                                  | 3               | Results and conclusions                            |
| <b>Introduction</b>       |                 |                                                                                                                                                                                      |                 |                                                    |
| Background/rationale      | 2               | Explain the scientific background and rationale for the investigation being reported                                                                                                 | 4               | Introduction                                       |
| Objectives                | 3               | State specific objectives, including any prespecified hypotheses                                                                                                                     | 4               | To objectively measure the number of exacerbations |
| <b>Methods</b>            |                 |                                                                                                                                                                                      |                 |                                                    |
| Study design              | 4               | Present key elements of study design early in the paper                                                                                                                              | 5               | Self-controlled risk interval analysis             |
| Setting                   | 5               | Describe the setting, locations, and relevant dates, including periods of recruitment, exposure, follow-up, and data collection                                                      | 5               | Study population and setting                       |
| Participants              | 6               | (a) <i>Cohort study</i> —Give the eligibility criteria, and the sources and methods of selection of participants. Describe methods of follow-up                                      | 5               | Study population and setting                       |
|                           |                 | (b) <i>Cohort study</i> —For matched studies, give matching criteria and number of exposed and unexposed                                                                             | N/A             |                                                    |
| Variables                 | 7               | Clearly define all outcomes, exposures, predictors, potential confounders, and effect modifiers. Give diagnostic criteria, if applicable                                             | 5               | Study outcomes                                     |
| Data sources/measurement  | 8*              | For each variable of interest, give sources of data and details of methods of assessment (measurement). Describe comparability of assessment methods if there is more than one group | 5               | Chart review                                       |
| Bias                      | 9               | Describe any efforts to address potential sources of bias                                                                                                                            | -               |                                                    |
| Study size                | 10              | Explain how the study size was arrived at                                                                                                                                            | 5               | Study population and setting                       |

|                        | <b>Item No.</b> | <b>Recommendation</b>                                                                                                                                                                                        | <b>Page No.</b>            | <b>Relevant text from manuscript</b>   |
|------------------------|-----------------|--------------------------------------------------------------------------------------------------------------------------------------------------------------------------------------------------------------|----------------------------|----------------------------------------|
| Quantitative variables | 11              | Explain how quantitative variables were handled in the analyses. If applicable, describe which groupings were chosen and why                                                                                 | 5                          | Data analysis                          |
| Statistical methods    | 12              | (a) Describe all statistical methods, including those used to control for confounding                                                                                                                        | 5                          | Data analysis                          |
|                        |                 | (b) Describe any methods used to examine subgroups and interactions                                                                                                                                          | N/A                        |                                        |
|                        |                 | (c) Explain how missing data were addressed                                                                                                                                                                  | 5                          | Study population and setting           |
|                        |                 | (d) <i>Cohort study</i> —If applicable, explain how loss to follow-up was addressed                                                                                                                          | N/A (no loss to follow-up) |                                        |
|                        |                 | (e) Describe any sensitivity analyses                                                                                                                                                                        | N/A                        |                                        |
| <b>Results</b>         |                 |                                                                                                                                                                                                              |                            |                                        |
| Participants           | 13*             | (a) Report numbers of individuals at each stage of study—eg numbers potentially eligible, examined for eligibility, confirmed eligible, included in the study, completing follow-up, and analysed            | 5-6                        | Study population                       |
|                        |                 | (b) Give reasons for non-participation at each stage                                                                                                                                                         | 5-6                        | Study population                       |
|                        |                 | (c) Consider use of a flow diagram                                                                                                                                                                           | 14                         | Flow chart                             |
| Descriptive data       | 14*             | (a) Give characteristics of study participants (eg demographic, clinical, social) and information on exposures and potential confounders                                                                     | 5, 6, 15, 20               | Demographic data, table 1, appendix 1  |
|                        |                 | (b) Indicate number of participants with missing data for each variable of interest                                                                                                                          | 14                         | Eight inevaluable cases                |
|                        |                 | (c) <i>Cohort study</i> —Summarise follow-up time (eg, average and total amount)                                                                                                                             | 6                          | Mean treatment-day                     |
| Outcome data           | 15*             | <i>Cohort study</i> —Report numbers of outcome events or summary measures over time                                                                                                                          | 6-7, 16-19                 | Rate of AECOPD, table 2, figure 2&3    |
| Main results           | 16              | (a) Give unadjusted estimates and, if applicable, confounder-adjusted estimates and their precision (eg, 95% confidence interval). Make clear which confounders were adjusted for and why they were included | 6                          | Total number of exacerbations per year |
|                        |                 | (b) Report category boundaries when continuous variables were categorized                                                                                                                                    | N/A                        |                                        |
|                        |                 | (c) If relevant, consider translating estimates of relative risk into absolute risk for a meaningful time period                                                                                             | N/A                        |                                        |

|                          | <b>Item No.</b> | <b>Recommendation</b>                                                                                                                                                      | <b>Page No.</b> | <b>Relevant text from manuscript</b> |
|--------------------------|-----------------|----------------------------------------------------------------------------------------------------------------------------------------------------------------------------|-----------------|--------------------------------------|
| Other analyses           | 17              | Report other analyses done – eg analyses of subgroups and interactions, and sensitivity analyses                                                                           | N/A             |                                      |
| <b>Discussion</b>        |                 |                                                                                                                                                                            |                 |                                      |
| Key results              | 18              | Summarise key results with reference to study objectives                                                                                                                   | 7-8             | In this study                        |
| Limitations              | 19              | Discuss limitations of the study, taking into account sources of potential bias or imprecision. Discuss both direction and magnitude of any potential bias                 | 7               | Limitations                          |
| Interpretation           | 20              | Give a cautious overall interpretation of results considering objectives, limitations, multiplicity of analyses, results from similar studies, and other relevant evidence | 9               | In summary                           |
| Generalisability         | 21              | Discuss the generalisability (external validity) of the study results                                                                                                      | 7-9             | Single centre                        |
| <b>Other information</b> |                 |                                                                                                                                                                            |                 |                                      |
| Funding                  | 22              | Give the source of funding and the role of the funders for the present study and, if applicable, for the original study on which the present article is based              | 9               | Financial/nonfinancial disclosure    |
